# Supplementary material
Source: PubMed Central journal article supplement (PMC55518)

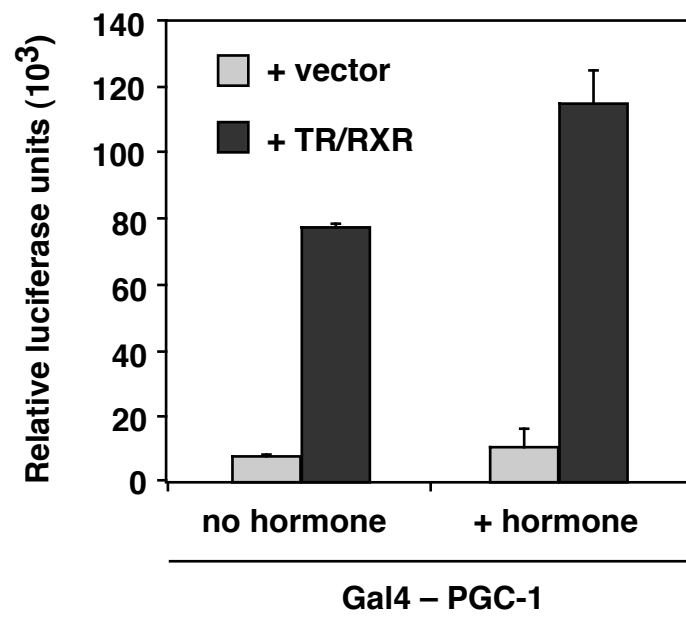

Supplement: pnas_171184698_3.pdf [file pnas_171184698_3.pdf]

PGC-1

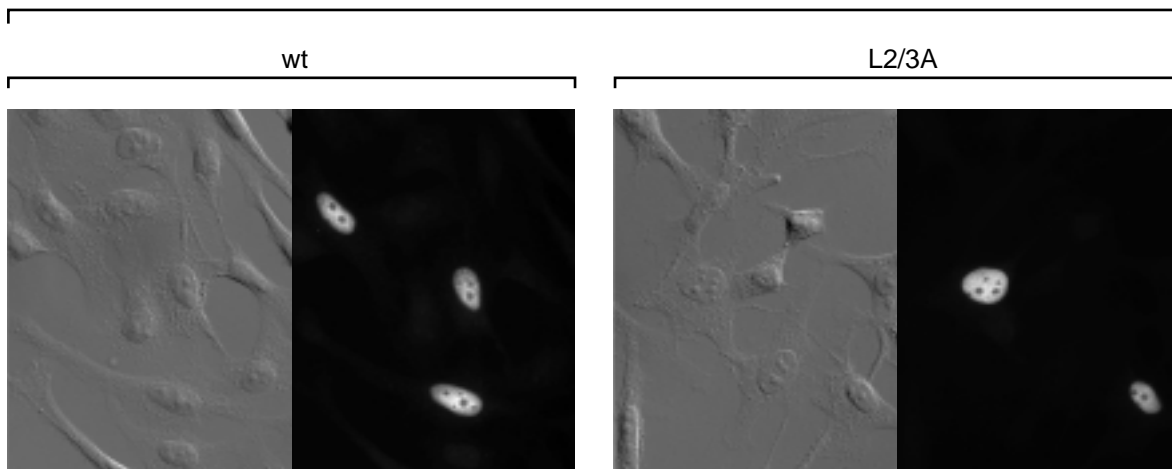

Gal4 – PGC-1

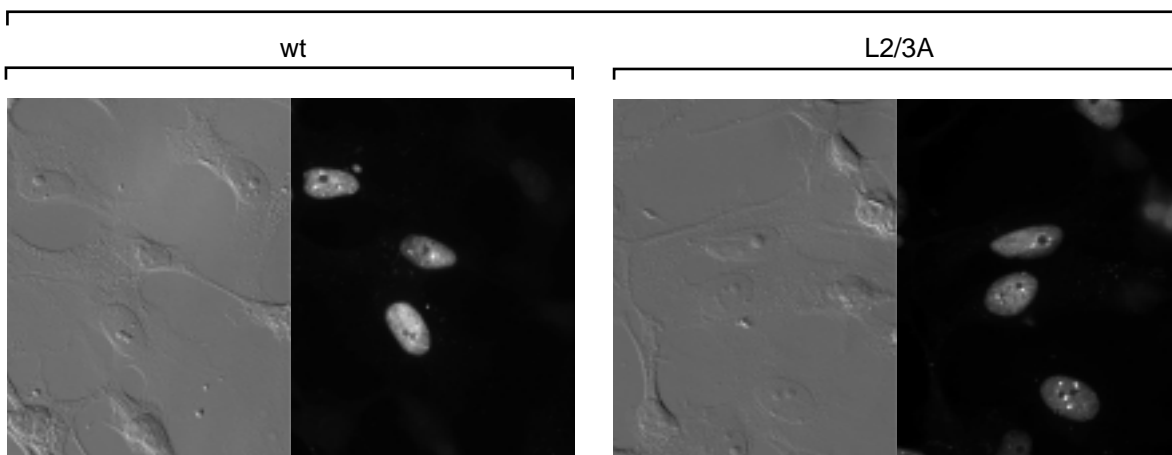

Supplement: pnas_171184698_4.pdf [file pnas_171184698_4.pdf]
